# Supplementary material
Source: Springer Nature journal article supplement (https://www.springermedizin.de/resource/supplementary/12957_2006_205_MOESM1_ESM.pdf/9564396)

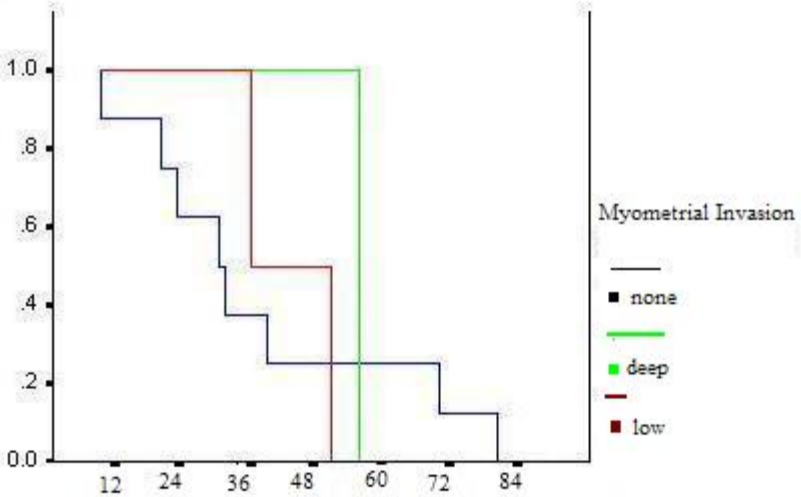

Supplement: MOESM1 [file 9564396]
